# Supplementary material for: GBP1&nbsp;Is a Prognostic Biomarker and Correlates With Immune Infiltrates in Gastric Cancer
Source: Research Square preprint supplement (doi:10.21203/rs.3.rs-262970/v1), 2021-03-01
Supplement: Supplementary file 1 [file d8e70293e26ba05fc86312ef.docx]

**Table S1. Correlation of GBP1 mRNA expression and OS/PFS in human cancer by Kaplan-Meier plotter database.**

| Tumor | OS | | | PFS | | |
| --- | --- | --- | --- | --- | --- | --- |
|  | HR | 95% CI | P | HR | 95% CI | P |
| Bladder Carcinoma | 1.27 | 0.89-1.8 | 0.18 | 1.84 | 0.91-3.74 | 0.087 |
| Cervical squamous cell carcinoma | 0.65 | 0.37-1.12 | 0.11 | 0.59 | 0.27-1.27 | 0.17 |
| Esophageal Adenocarcinoma | 1.95 | 1.02-3.7 | **0.038** | - | - | - |
| Esophageal Squamous Cell Carcinoma | 0.63 | 0.29-1.4 | 0.26 | 0.29 | 0.11-0.79 | **0.01** |
| Head-neck squamous cell carcinoma | 0.78 | 0.56-1.08 | 0.14 | 0.43 | 0.2-0.91 | **0.023** |
| Kidney renal clear cell carcinoma | 0.55 | 0.41-0.74 | **6.10E-05** | 2.88 | 0.81-10.28 | 0.088 |
| Kidney renal papillary cell carcinoma | 0.31 | 0.14-0.7 | **0.0027** | 0.3 | 0.14-0.64 | **9.70E-04** |
| Lung adenocarcinoma | 0.69 | 0.51-0.93 | **0.014** | 0.73 | 0.47-1.15 | 0.18 |
| Lung squamous cell carcinoma | 1.29 | 0.99-1.69 | 0.063 | 1.41 | 0.75-2.65 | 0.29 |
| Pancreatic ductal adenocarcinoma | 0.54 | 0.35-0.83 | **0.004** | 2.22 | 0.66-7.52 | 0.19 |
| Pheochromocytoma and Paraganglioma | 0.21 | 0.04-1.15 | **0.047** | 3.82 | 0.47-31.12 | 0.18 |
| Rectum adenocarcinoma | 0.49 | 0.22-1.07 | 0.068 | 0.2 | 0.03-1.58 | 0.095 |
| Sarcoma | 1.9 | 1.28-2.83 | **1.30E-03** | 0.68 | 0.41-1.12 | 0.13 |
| Testicular Germ Cell Tumor | 0.35 | 0.04-3.39 | 0.35 | 2.98 | 1.39-6.35 | **3.10E-03** |
| Thymoma | 0.42 | 0.11-1.7 | 0.21 | - | - | - |
| Thyroid carcinoma | 4.33 | 1.6-11.7 | **0.0017** | 0.51 | 0.23-1.13 | 0.09 |
| Uterine corpus endometrial carcinoma | 0.45 | 0.29-0.68 | **1.00E-04** | 0.6 | 0.35-1.01 | 0.052 |

Bold values indicate *P* < 0.05.
